# Supplementary material
Source: publisher figshare collection journal article supplement (https://sage.figshare.com/ndownloader/files/15449852)
Supplement: Supplementary file 1 [file 15449852]

Eligible studies were identified from the PubMed, Cochrane Library and Embase databases using the following keywords combined with Boolean operators: “Dupuytren” AND (“dorsal” OR “knuckle pads” OR “extensor” OR “nodule” OR “swan neck deformity” OR “boutonniere” OR “retinacular”). Reference lists of selected articles were also examined to identify additional potentially eligible articles.
